# Supplementary material for: Metal oxide-free flexible organic solar cells with 0.1 M perchloric acid sprayed polymeric anodes
Source: Royal Society of Chemistry journal article supplement (doi:10.1039/d0ta07934k), 2020-01-01
Supplement: d0ta07934k1.pdf [file d0ta07934k1.pdf]

## Supplementary Information

### **Metal Oxide-Free Flexible Organic Solar Cells with 0.1 M Perchloric Acid Sprayed Polymeric Anodes**

Juanyong Wan,<sup>a,c</sup> Xi Fan,<sup>a,b,\*</sup> Huihui Huang,<sup>c</sup> Jinzhao Wang,<sup>d</sup> Zhiguo Zhang,<sup>e</sup> Junfeng Fang<sup>a</sup> and Feng Yan<sup>b</sup>

<sup>a</sup>Ningbo Institute of Materials Technology and Engineering, Chinese Academy of Sciences, Ningbo, 315201, P. R. China. E-mail: fanxi@nimte.ac.cn.

<sup>b</sup>Department of Applied Physics, The Hong Kong Polytechnic University, Hung Hom, Kowloon, Hong Kong, P. R. China.

<sup>c</sup>School of Physics and Electronics, Hunan University, Changsha 410082, P. R. China.

<sup>d</sup>Department of Material Science and Engineering, Hubei University, Wuhan 430062, P. R. China.

<sup>e</sup>State Key Laboratory of Organic/Inorganic Composites, Beijing Advanced Innovation Center for Soft Matter Science and Engineering, Beijing University of Chemical Technology, Beijing 100029, P. R. China.

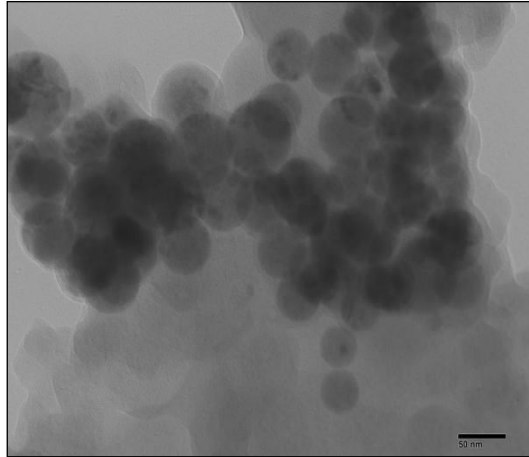

**Fig. S1** Aggregate morphology of the PEDOT:PSS anodes with >99.5 wt% CH<sub>3</sub>SO<sub>3</sub>H soaking treatment.

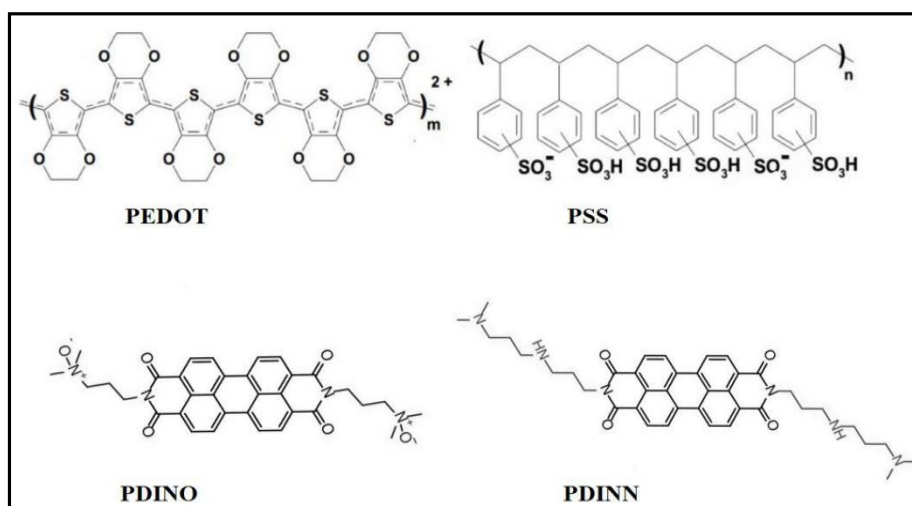

**Fig. S2** Molecular structures of PEDOT:PSS, PDINO and PDINN.

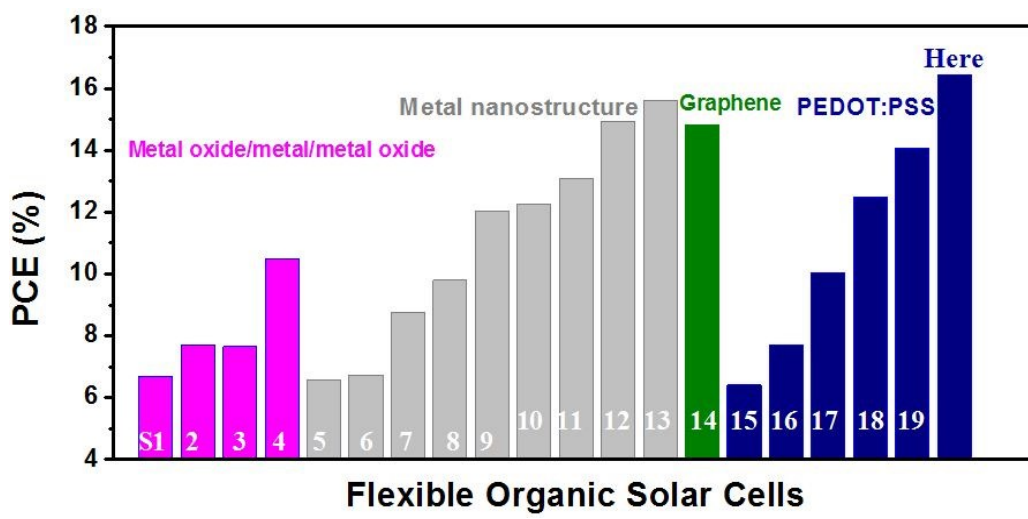

**Fig. S3** Plotted PCE values of single-junction flexible OSCs reported in literatures and in this work.

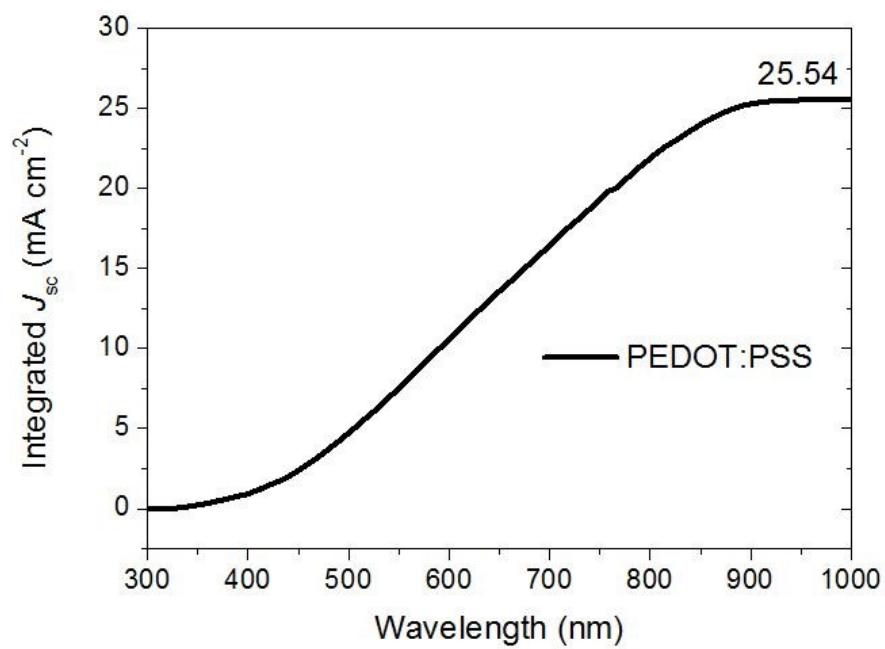

**Fig. S4** The integrated current density of the flexible OSCs based on the PEDOT:PSS electrodes with the  $\text{HClO}_4$  treatments.

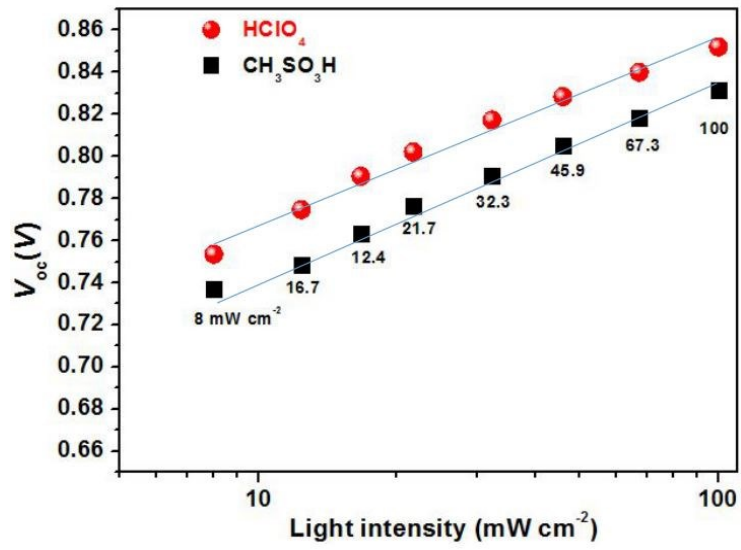

**Fig. S5**  $V_{oc}$  versus light intensity of the flexible OSCs based on the PEDOT:PSS electrodes with the  $\text{HClO}_4$  treatments ( $n=1.45$ ) and the  $\text{CH}_3\text{SO}_3\text{H}$  treatments ( $n=1.58$ ), respectively.

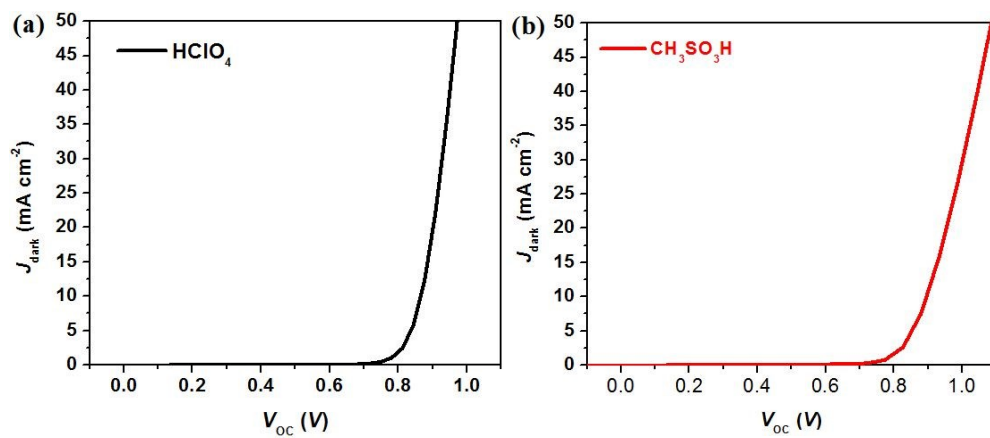

**Fig. S6** The dark current density of the flexible OSCs based on the PEDOT:PSS electrodes with the  $\text{HClO}_4$  treatments (a) and the  $\text{CH}_3\text{SO}_3\text{H}$  treatments (b).



**Tab. S1** Summaries of photovoltaic characteristics of single-junction flexible organic solar cells with flexible transparent electrodes

---

| Flexible electrode | Preparation method | Active layer | PCE (%) | Refer. |
|--------------------|--------------------|--------------|---------|--------|
|--------------------|--------------------|--------------|---------|--------|

---

|                                      |                                          |                                 |             |     |
|--------------------------------------|------------------------------------------|---------------------------------|-------------|-----|
| ZnO/Cu(8.0 nm) on Cu(O)/ZnO          | Magnetron sputtering/Thermal evaporation | PTB7:PC <sub>71</sub> BM        | 6.70        | S1  |
| ZnO/Cu(9.5 nm) on Cu(O)/ZnO          |                                          | PTB7:PC <sub>71</sub> BM        | 7.7         | S2  |
| ZnO/Cu (0:5%)(7 nm)/ZnO              |                                          | PTB7-Th:PC <sub>71</sub> BM     | 7.65        | S3  |
| TiO <sub>2</sub> /ZnO/Ag(8.0 nm)/ZnO | Vacuum sputtering                        | PBDB-T:IT-M:PC <sub>71</sub> BM | 10.48%      | S4  |
|                                      |                                          |                                 | Best: 10.62 |     |
| Ag grid/PEDOT:PSS                    | Thermal evaporation/Solution preparation | PTB7-Th:PC <sub>71</sub> BM     | 6.58        | S5  |
| Ag mesh/PEDOT:PSS                    | Printing/Solution preparation            | PTB7:PC <sub>71</sub> BM        | 6.73        | S6  |
| Ag NW                                | Solution preparation                     | PTB7-Th:PC <sub>71</sub> BM     | 8.75        | S7  |
| Ag island/PEDOT:PSS                  | Thermal evaporation/Solution preparation | PTB7-Th:PC <sub>71</sub> BM     | 9.8         | S8  |
|                                      |                                          |                                 | Best: 9.9   |     |
| Ag NW/Al-ZnO                         | Solution preparation                     | PM6:IT-4F                       | 12.02       | S9  |
| Ag/Cu grid                           | Nanoimprinting and electrodeposition     | NF3000-P:NF3000-N               | 12.26       | S10 |
| Ag NW/PSSNa                          | Solution preparation                     |                                 | 13.1        | S11 |
| Ag NW/Al-ZnO                         | Solution preparation                     | PBDB-T-2F:Y6                    | 14.93       | S12 |
|                                      |                                          |                                 | Best:15.21  |     |
| Transferred Ag NW/ZnO                | Solution preparation                     | PM6:N3:PC71BM                   | 15.6        | S13 |
|                                      |                                          |                                 | Best: 16.1  |     |
| Graphene                             | Chemical vapor deposition                | PM6:Y6                          | 14.8        | S14 |
|                                      |                                          |                                 | Best: 15.2  |     |
| PEDOT:PSS                            | Aqueous solution preparation             | PBDTT-S-TT:PC <sub>71</sub> BMP | 6.42        | S15 |

|           |                              |                            |             |      |
|-----------|------------------------------|----------------------------|-------------|------|
| PEDOT:PSS | Aqueous solution preparation | TB7-Th:PC <sub>71</sub> BM | 7.7         | S16  |
| PEDOT:PSS | Aqueous solution preparation | PBDB-T:IT-M                | 10.03       | S17  |
|           |                              |                            | Best: 10.12 |      |
| PEDOT:PSS | Aqueous solution preparation | PCE-10:IEICO-4F            | 12.5        | S18  |
| PEDOT:PSS | Aqueous solution preparation | PM6:Y6:PC <sub>71</sub> BM | 14.06       | S19  |
| PEDOT:PSS | Aqueous solution preparation | PM6:Y6                     | 16.44       | Here |
|           |                              |                            | Best:16.71  |      |

## References

- [1] G. Zhao, S. M. Kim, S. Lee, T. Bae, C. Mun, S. Lee, H. Yu, G. Lee, H. Lee, M. Song, J. Yun, *Adv. Funct. Mater.* **2016**, *26*, 4180.
- [2] G. Zhao, M. Song, H. Chung, S. M. Kim, S. Lee, J. Bae, T. Bae, D. Kim, G. Lee, S. Z. Han, H. Lee, E. Choi, J. Yun, *ACS Appl. Mater. Interfaces*, **2017**, *9*, 38695.
- [3] G. Zhao, W. Wang, T. Bae, S. Lee, C. Mun, S. Lee, H. Yu, G. Lee, M. Song, J. Yun, *Nat. Commun.* **2015**, *6*, 8830.
- [4] Q. Liu, J. Toudert, L. Ciammaruchi, G. Martinez-Denegri, J. Martorell, *J. Mater. Chem. A* **2017**, *5*, 25476-25484.
- [5] J. Wang, F. Fei, Q. Luo, S. Nie, N. Wu, X. Chen, W. Su, Y. Li, C. Ma, *ACS Appl. Mater. Interfaces* **2017**, *9*, 7834.
- [6] W. Kim, S. Kim, I. Kang, M. S. Jung, S. J. Kim, J. K. Kim, S. M. Cho, J. -H. Kim, J. H. Park, *ChemSusChem* **2016**, *9*, 1042.
- [7] J. H. Seo, I. Hwang, H. -D. Um, S. Lee, K. Lee, J. Park, H. Shin, T. -H. Kwon, S. J. Kang, K. Seo, *Adv. Mater.* **2017**, *29*, 1701479.
- [8] H. Kang, S. Jung, S. Jeong, G. Kim, K. Lee, *Nat. Commun.* **2015**, *6*, 6503.
- [9] Y. X. Zhang, J. Fang, W. Li, Y. Shen, J. D. Chen, Y. Li, H. Gu, S. Pelivani, M. Zhang, Y. Li, J. X. Tang, *ACS Nano* **2019**, *13*, 4686–4694.
- [10] Y. F. Han, X. L. Chen, J. F. Wei, G. Q. Ji, C. Wang, W. C. Zhao, J. Q. Lai, W. S. Zha, Z. R. Li, L. P. Yan, H. M. Gu, Q. Luo, Q. Chen, L. W. Chen, J. H. Hou, W. M. Su, C. Q. Ma, *Adv. Sci.* **2019**, *6*, 1901490.
- [11] Y. N. Sun, M. J. Chang, L. X. Meng, X. J. Wan, H. H. Gao, Y. M. Zhang, K. Zhao, Z. H. Sun, C. X. Li, S. R. Liu, H. K. Wang, J. J. Liang, Y. S. Chen, *Nat. Electron.* **2019**, *2*, 513–520.
- [12] X. B. Chen, G. Y. Xu, G. Zeng, H. W. Gu, H. Y. Chen, H. T. Xu, H. F. Yao, Y. W. Li, J. H. Hou, Y. F. Li, *Adv. Mater.* **2020**, *32*, 1908478.

- [13] T. Y. Qu, L. J. Zuo, J. D. Chen, X. L. Shi, T. Zhang, L. Li, K. C. Shen, H. Ren, S. Wang, F. M. Xie, Y. Q. Li, Alex K. Y. Jen, J. X. Tang, *Adv. Optical Mater.* **2020**, 2000669.
- [14] D. Koo, S. Jung, J. Seo, G. Jeong, Y. Choi, J. Lee, S. M. Lee, Y. Cho, M. Jeong, J. Lee, J. Oh, C. Yang, H. Park, *Joule* **2020**, *4*, 1-14.
- [15] X. Fan, B. G. Xu, S. H. Liu, C. H. Cui, J. Z. Wang, F. Yan, *ACS Appl. Mater. Interfaces* **2016**, *8*, 14029.
- [16] N. Kim, H. Kang, J. -H. Lee, S. Kee, S. H. Lee, K. Lee, *Adv. Mater.* **2015**, *27*, 2317.
- [17] W. Song, X. Fan, et al., *Adv. Mater.* **2018**, *30*, 1800075.
- [18] S. X. Xiong, L. Hu, L. Hu, L. L. Sun, F. Qin, X. J. Liu, M. Fahlman, Y. H. Zhou. *Adv. Mater.* **2019**, *31*, 1806616.
- [19] T. Yan, W. Song, et al. *Adv. Mater.* **2019**, *31*, 1902210.

**Tab. S2** Physical Properties of PEDOT:PSS (Clevios PH1000) and PEDOT:PSS (Clevios P VP A14083) Used to make transparent electrodes and hole transport layers, respectively

| Product     | Solids content | PEDOT:PSS ratio (by weight) | Particle size (nm) d50 | Viscosity (cP) | Film resistance ( $\Omega$ .cm) | Work function |
|-------------|----------------|-----------------------------|------------------------|----------------|---------------------------------|---------------|
| P VP A14083 | 1.3–1.7%       | 1:6                         | Max:35 distribution50  | 5–12           | 500–5000                        | 5.0–5.2       |
| PH1000      | 1.0–1.3%       | 1:1.25                      | Major:120              | 15–50          | <0.0012 (with doping)           | 4.8–5.2 eV    |
